# Supplementary material
Source: MDPI journal article supplement (https://www.mdpi.com/2073-4344/8/2/51)
Supplement: s1 [file s1]

Supplemental materials: An MM and QM Study of Biomimetic Catalysis of Diels-Alder Reactions Using Cyclodextrins

**Table S1.** Key geometric parameters (bond lengths and improper dihedral angles) of the transition states optimized with the PM3 method. Atom names are in Figure 6 of the main text. Units are in Å for bond lengths and degrees for improper dihedral angles.

| No. | bond C1–C3 | bond C2–C4 | improper  C1–C2–H1–C5 | improper  C2–H2–C1–C6 | improper  C3–H3–C7–C9 | improper  C4–C8–C11–C10 |
| --- | --- | --- | --- | --- | --- | --- |
| 1 | 2.130 | 2.298 | 23.119 | 20.047 | 16.033 | 13.738 |
| 2 | 2.125 | 2.316 | 22.883 | 19.641 | 15.879 | 13.229 |
| 3 | 2.127 | 2.312 | 23.413 | 19.531 | 16.184 | 13.394 |
| 4 | 2.141 | 2.297 | 22.869 | 21.064 | 15.451 | 13.417 |
| 5 | 2.140 | 2.283 | 22.885 | 20.346 | 15.911 | 13.947 |

**Table S2.** Activation free energies and its enthalpy and entropy components obtained by the PM3 method for the Diels-Alder reaction with and without cyclodextrin catalysts. Units are in kcal/mol.

| Reaction | ΔG | ΔH | -TΔS |
| --- | --- | --- | --- |
| non-catalyzed forward reaction | 49.04 | 31.76 | 17.28 |
| forward reaction catalyzed by β-CD, set 1a | 36.47 | 30.96 | 5.50 |
| forward reaction catalyzed by β-CD, set 2b | 38.32 | 33.32 | 5.00 |
| forward reaction catalyzed by dimethyl-β-CD, set 1a | 29.46 | 27.90 | 1.56 |
| forward reaction catalyzed by dimethyl-β-CD , set 2b | 29.17 | 28.13 | 1.04 |

a. Transition state structure has hydrogen bonds between the two carbonyl groups of 2a and cyclodextrin.

b. Transition state structure does not have hydrogen bonds.

**
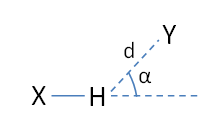
.**

**Figure S1.** Definition of hydrogen bonds. X and Y are the donor and acceptor, respectively. d is the distance between the acceptor Y and the hydrogen, and α is the complimentary angle of X–H···Y. A hydrogen bond is formed if d is < 2.2 Å and α is < 90º.

| 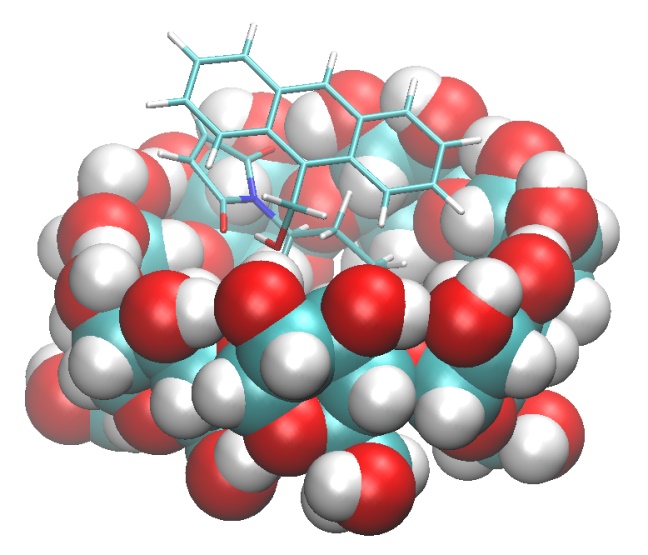 | 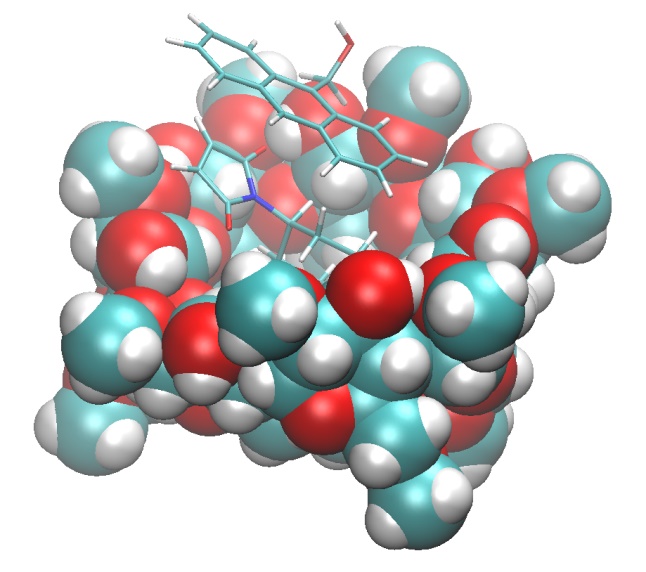 |
| --- | --- |
| (**1**) | (**2**) |
|  | |
| (**3**) | |
|  | |
| (**4**) | |

**Figure S2.** RMSD (**3–4**) of compound 1 with respect to the initial conformations (**1–2**) in the 300-ns MD runs. (**1**) (**3**): complex of β-CD with 1 and 2a; (**2**) (**4**): complex of dimethyl-β-CD with 1 and 2a.

product

reactants

product

product

reactants

reactants

**Figure S3.** Reaction paths obtained with the PM3 method. In all plots, the curves are normalized to set the reactant energies at the zero of energy. Top: reaction paths for the reaction catalyzed by β-CD, with and without hydrogen bonds. Middle: reaction paths for the reaction catalyzed by dimethyl-β-CD, with and without hydrogen bonds. Bottom: reaction paths for uncatalyzed reaction between compounds 1 and 2a, reaction catalyzed by β-CD, and reaction catalyzed by dimethyl-β-CD. No hydrogen bonds exist between compound 2a and the cyclodextrin.


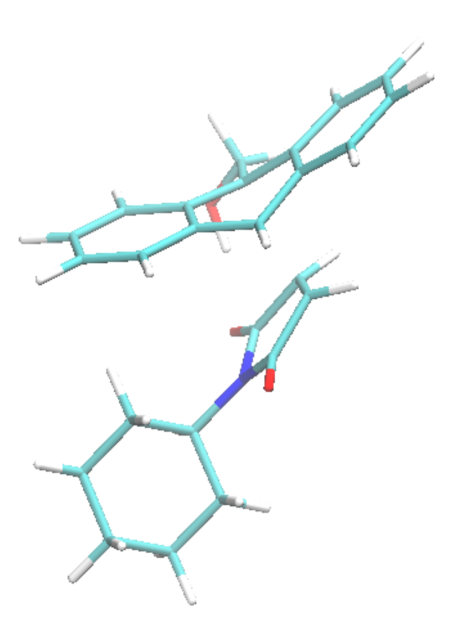


1


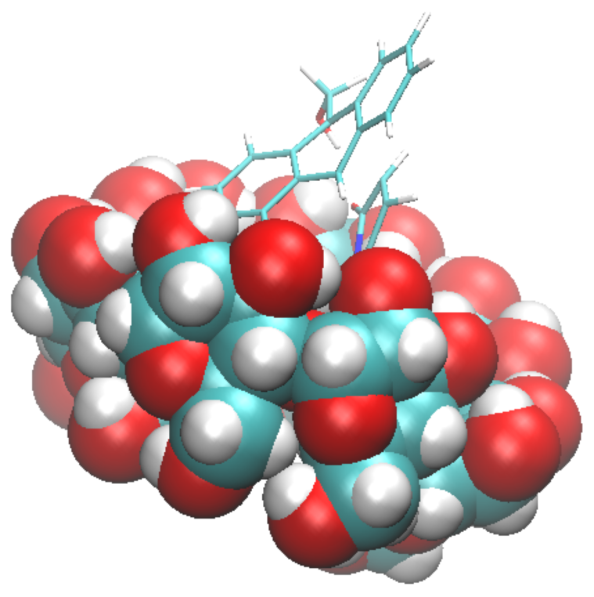

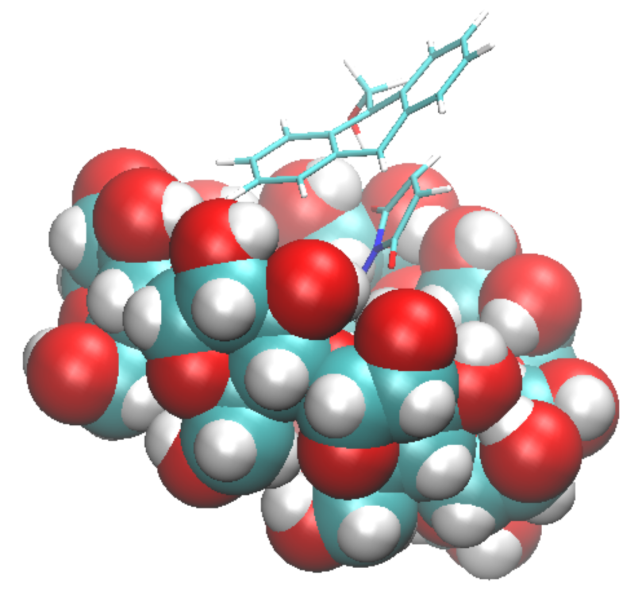


3

2


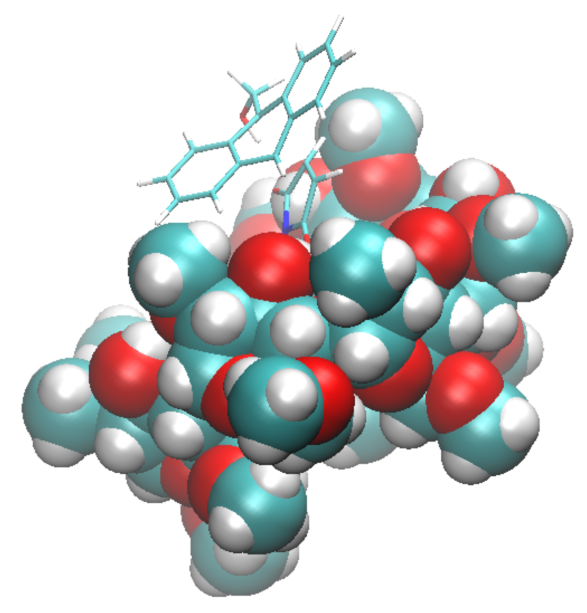

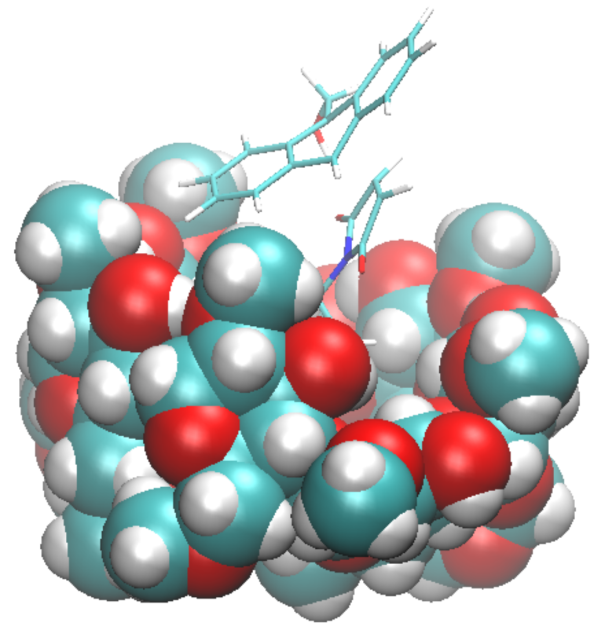


5

4

**Figure S4.** Transition states of five reactions optimized with the PM3 method. (**1**) Transition state structure in the non-catalyzed reaction between compounds 1 and 2a. (**2**) Transition state structure in the reaction catalyzed by β-CD, with hydrogen bonds between the two carbonyl groups of 2a and β-CD. (**3**) Transition state structure in the reaction catalyzed by β-CD, without hydrogen bonds. (**4**) Transition state structure in the reaction catalyzed by dimethyl-β-CD, with hydrogen bonds between the two carbonyl groups of 2a and dimethyl-β-CD. (**5**) Transition state structure in the reaction catalyzed by dimethyl-β-CD, without hydrogen bonds.

© 2017 by the authors. Submitted for possible open access publication under the
terms and conditions of the Creative Commons Attribution (CC BY) license (http://creativecommons.org/licenses/by/4.0/).
